# Supplementary material for: Elucidating the transcriptional program of feline injection-site sarcoma using a cross-species mRNA-sequencing approach
Source: Springer Nature journal article supplement (doi:10.1186/s12885-019-5501-z), 2019-04-04
Supplement: MOESM2 [file 16609780]

**cDNA sequence used for LATS1 qPCR assay design:**

For *LATS1*, a custom TaqMan assay was used based on the submitted sequence:

GAGTACTTCAGAAGTTAATCCACAAATGCTTCAAGATTTGCAAGCTGCTGGA  
TTTGATGAGGATATGGTTATACAAGCTCTTCAGAAAATAACAACAGAAGTA  
TAGAGGCAGCAATTGAATTCATTAGTAAAATGAGTTACCAAGATCCTCGCCG  
GGAACAGAT.
