# Supplementary material for: Elucidating the transcriptional program of feline injection-site sarcoma using a cross-species mRNA-sequencing approach
Source: Springer Nature journal article supplement (doi:10.1186/s12885-019-5501-z), 2019-04-04

**A****anti-BARX1**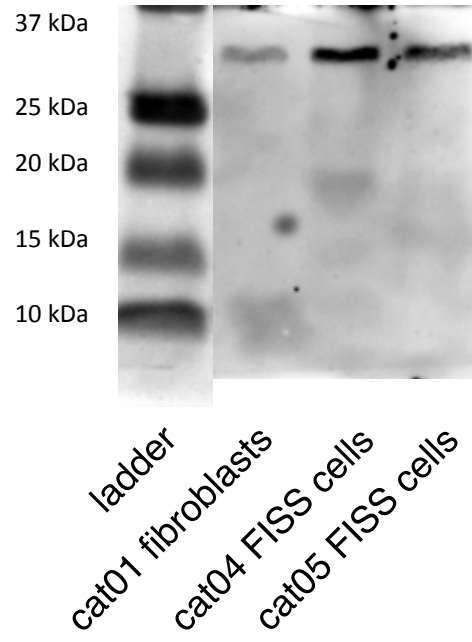**B****Total protein stain**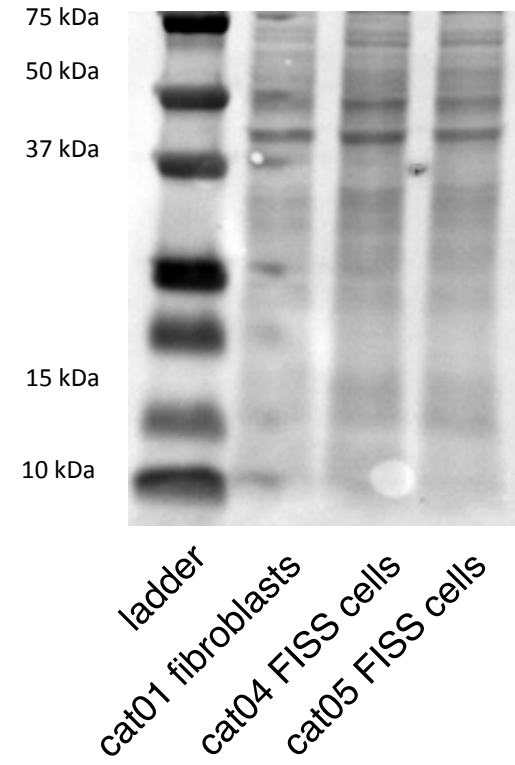**C****anti-FN1**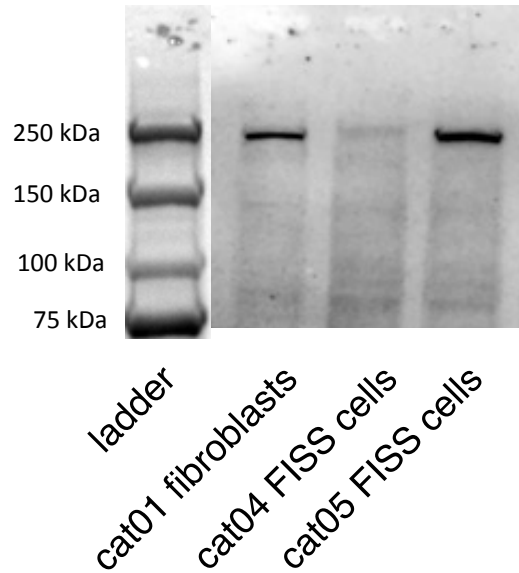**D****Total protein stain**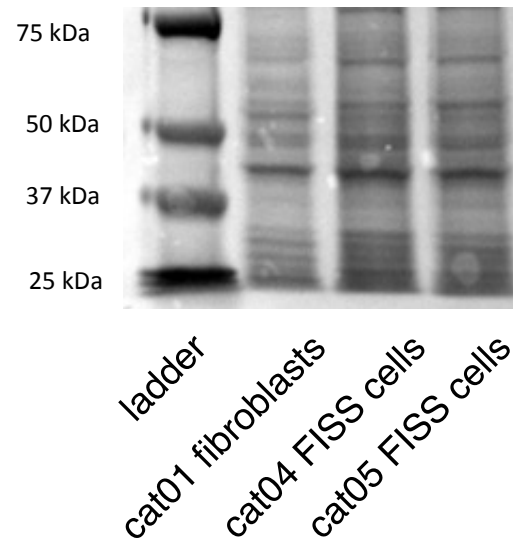

Supplement: MOESM7 [file 16609780]
